# Supplementary material
Source: publisher figshare collection journal article supplement (https://frontiersin.figshare.com/ndownloader/files/26009420)
Supplement: Supplementary file 1 [file 26009420]

Supplementary Material

**Supplementary Table 2**.Hardy-Weinberg equilibrium (HWE) and linkage disequilibrium (LD) for the 19 populations of *Euterpe precatoria* collected in the states of Amazonas and Rondônia in Brazil

| **Populations** | **CLD (LD%)** | | | **Loci** | | | | | | | | | | | | | | | | | | | | | | | |
| --- | --- | --- | --- | --- | --- | --- | --- | --- | --- | --- | --- | --- | --- | --- | --- | --- | --- | --- | --- | --- | --- | --- | --- | --- | --- | --- | --- |
| **Epr01** | | **Epr02** | | **Epr22** | | **Epr32** | | **Epr05** | | **Epr13** | | **Epr15** | | **Epr21** | | **Epr36** | | **Epr14** | | **Epr18** | | **Epr19** | |
| **Parintins** | | 31 | (46.97) | | 0.001* | | 0.157[1] | | 0.001* | | 0.041 | | 0.087 | | 0.002*[1] | | 0.001*[1] | | 0.001*[1] | | 0.202 | | 0.062 | | 0.001* | | 0.001*[3] | |
| **Urucara** | | 5 | (7.58) | | 0.598 | | 0.001* | | 0.001* | | 0.178 | | 0.243 | | 0.052 | | 0.004* | | 0.296 | | 0.001* | | 0.001* | | 0.001* | | 0.008[1] | |
| **São Sebastião do Uatumã** | | 11 | (16.67) | | 0.143 | | 0.005 | | 0.006 | | 0.122 | | 0.019 | | 0.001* | | 0.001* | | 0.001*[1] | | 0.067 | | 0.001* | | 0.001* | | 0.001* | |
| **Itapiranga** | | 7 | (10.61) | | 0.145 | | 0.001* | | 0.788[1] | | 0.750 | | 0.003* | | 0.001* | | 0.187 | | 0.001* | | 0.001* | | 0.002* | | 0.001* | | 0.001* | |
| **Anorí** | | 5 | (7.58) | | 0.908 | | 0.971 | | 0.055 | | 0.206 | | 0.294[1] | | 0.043 | | 0.126 | | 0.002* | | 0.001* | | 0.015 | | 0.001* | | 0.002* | |
| **Codajas** | | 5 | (7.58) | | 0.651[1] | | 0.001* | | 0.842 | | 1.000 | | 0.155 | | 0.001* | | 0.059 | | 0.001* | | 0.487 | | 0.204 | | 0.001* | | 0.001* | |
| **Coari** | | 1 | (1.52) | | 0.993 | | 0.679[1] | | 0.912 | | 0.581 | | 0.275 | | 0.010 | | 0.039 | | 0.001* | | 0.910 | | 0.830 | | 0.001* | | 0.005 | |
| **Presidente Figueiredo** | | 7 | (10.61) | | 0.021 | | 0.370 | | 0.381 | | 1.000 | | 0.007 | | 0.136 | | 0.001* | | 0.001* | | 0.001* | | 0.001*[1] | | 0.001*[1] | | 0.001*[1] | |
| **Manacapuru** | | 9 | (13.64) | | 0.417 | | 0.323 | | 0.467 | | 0.095 | | 0.186 | | 0.281 | | 0.002* | | 0.046 | | 1.000 | | 0.001*[1] | | 0.001* | | 0.002*[1] | |
| **Itacoatiara** | | 5 | (7.58) | | 0.948[1] | | 0.539[1] | | 0.003* | | 0.011 | | 0.019 | | 0.002* | | 0.006 | | 0.002* | | 1.000 | | 0.001* | | 0.001* | | 0.003*[1] | |
| **Novo Airão** | | 13 | (19.70) | | 0.008 | | 0.853 | | 0.555 | | 0.065 | | 0.001* | | 0.059 | | 0.001* | | 0.001* | | 0.003* | | 0.293 | | 0.118 | | 1.000 | |
| **Borba** | | 0 | (0.00) | | 0.431 | | 0.175 | | 0.978 | | 0.049 | | 0.441 | | 0.002* | | 0.118 | | 0.072 | | 0.995 | | 0.019 | | 0.841 | | 0.002* | |
| **Manicore** | | 8 | (12.12) | | 0.001* | | 0.025 | | 0.996 | | 0.005 | | 0.214 | | 0.005 | | 0.168 | | 1.000 | | 0.319 | | 0.002*[2] | | 0.048[1] | | 0.001*[1] | |
| **Tabatinga** | | 8 | (12.12) | | 0.047 | | 0.001* | | 1.000 | | 0.001* | | 0.172 | | 0.693 | | 0.102[1] | | 0.001* | | 0.441 | | 0.001* | | 0.007 | | 0.001* | |
| **Benjamin Constant** | | 9 | (13.64) | | 1.000 | | 0.442 | | 0.220[1] | | 0.001* | | 0.004* | | 0.001* | | 0.033 | | 0.001* | | 0.022 | | 0.001*[1] | | 0.001* | | 0.001* | |
| **Atalaia do Norte** | | 34 | (51.52) | | 0.071 | | 0.319 | | 0.809 | | 0.001*[1] | | 0.037 | | 0.001* | | 0.001* | | 0.001*[1] | | 0.001* | | 0.001* | | 0.011[1] | | 0.001* | |
| **Nova Mamoré** | | 12 | (18.18) | | 0.001* | | 0.008 | | 0.025 | | 0.443 | | 0.001*[1] | | 0.981 | | 0.071 | | 0.285 | | 0.001* | | 0.865 | | 0.011 | | 0.001*[1] | |
| **Guajará Mirim** | | 17 | (25.76) | | 0.015 | | 0.001*[1] | | 0.836 | | 0.105 | | 0.001* | | 1.000 | | 0.010 | | 0.071 | | 0.006 | | 0.385[1] | | 0.001* | | 0.001* | |
| **Porto Velho** | | 10 | (15.15) | | 0.001* | | 0.088[2] | | 0.009 | | 0.928 | | 0.001* | | 0.417 | | 0.001* | | 0.002* | | 0.001* | | 0.357 | | 0.001* | | 0.001* | |

*The *HWE* was determined at P> 0.00417. The sum of the combinations with LD (CLD) was determined with P> 0.0007576. Bonferroni correction was used (Rice, 1989). []=number of private alleles.
